# Supplementary material
Source: MDPI journal article supplement (https://www.mdpi.com/2218-0532/89/4/47)

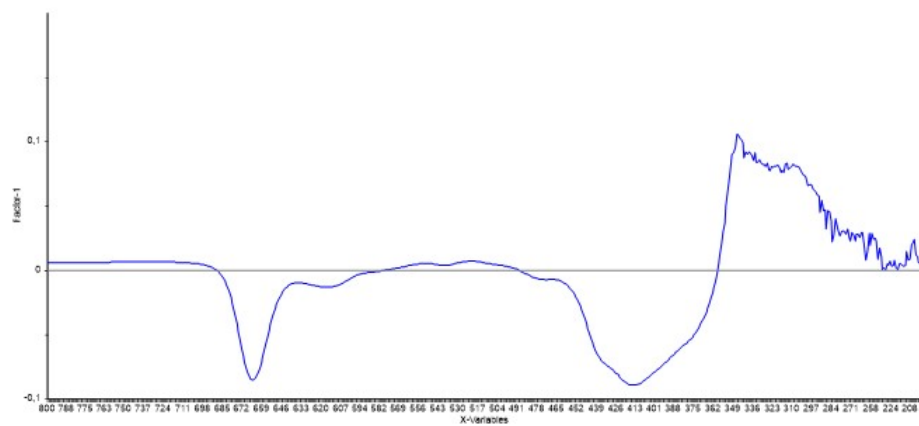

**Figure S1.** PLS analysis X-loading weights of UV-Vis Spectra.

Supplement: s1 [file s1]
